# Supplementary material for: PMI: A ΔΨm Independent Pharmacological Regulator of Mitophagy
Source: PubMed Central journal article supplement (PMC4245710; doi:10.1016/j.chembiol.2014.09.019), 2014-11-20
Supplement: mmc1.pdf [file mmc1.pdf]

**Chemistry & Biology, Volume 21**

## **Supplemental Information**

### **PMI: A $\Delta\Psi_m$ Independent Pharmacological**

#### **Regulator of Mitophagy**

**Daniel A. East, Francesca Fagiani, James Crosby, Nikolaos D. Georgakopoulos, H  l  ne Bertrand, Marjolein Schaap, Adrian Fowkes, Geoff Wells, and Michelangelo Campanella**

**A**

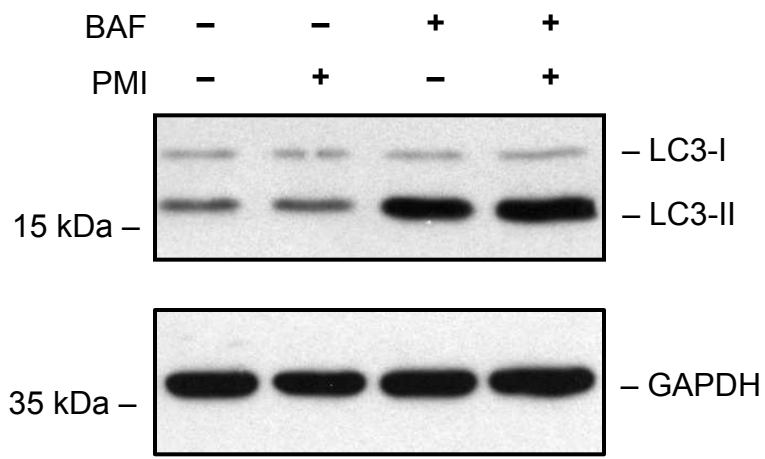

**B**

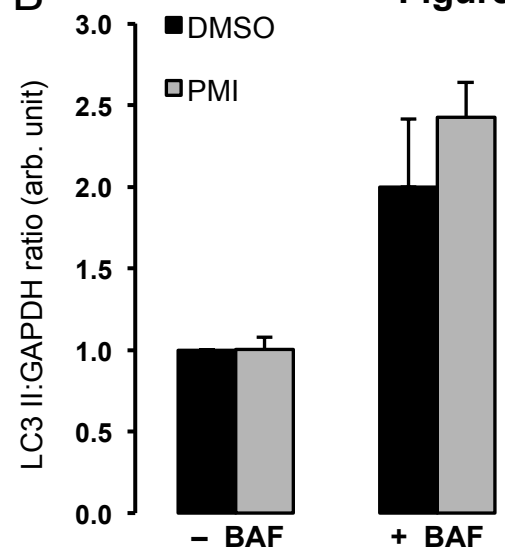

**C**

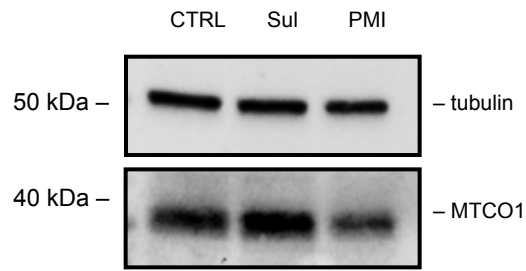

**D**

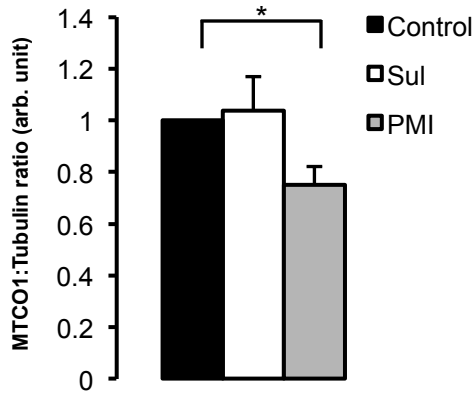

**E**

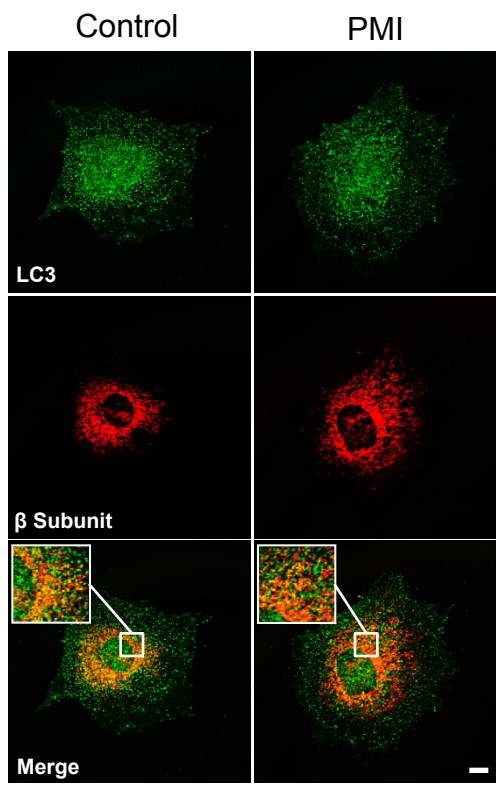

**F**

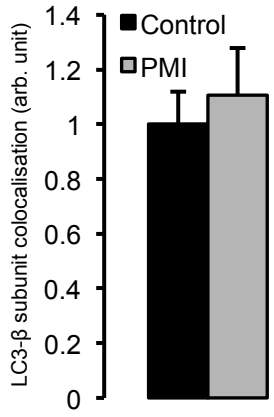

**G**

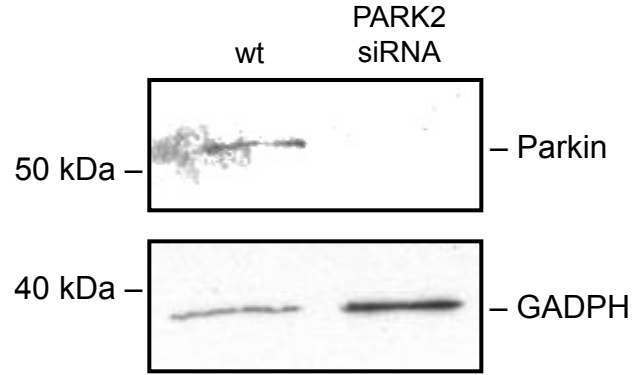

## Figure S1

(A) Western blot analysis of LC3-I and LC3-II expression levels in MEF cells treated with DMSO vehicle control or 10  $\mu$ M PMI in the presence or absence of bafilomycin A1 (100 nM) for 24 hours and quantified in (B). The data indicate that PMI does not increase the activation of general autophagy as measured by the conversion of LC3-I to LC3-II,  $n=3$ . (C) Western blot to compare MTCO1 levels following 24 hours PMI (10  $\mu$ M) or sulforaphane (1  $\mu$ M) exposure and is quantified in (D)  $n=3$ . The data demonstrates that PMI causes a decrease in levels of mitochondrial protein MTCO1, indicative of mitophagy, whereas sulforaphane does not. (E) Representative images of LC3 localisation in *Nrf2*<sup>-/-</sup> MEF cells treated with DMSO vehicle control or 10  $\mu$ M PMI for 24 hours. Scale bar= 10  $\mu$ m. A magnification of the merge images is shown in areas demarcated by the white box. Mitochondrial LC3 colocalisation is quantified in (F)  $n>10$ . The data shows that in the absence of *Nrf2*, the effect of PMI on mitochondrial LC3 localisation is abolished. (G) Western Blot demonstrating Parkin knock-down in cell lysates from MEFs transiently transfected with PARK2 siRNA. All values are mean  $\pm$  SEM, \* $p<0.05$
